# Supplementary material
Source: PubMed Central journal article supplement (PMC3123785)
Supplement: mmc3.pdf [file mmc3.pdf]

Supplemental Figure 3

**A** *Adjustment for Multiple Comparisons for the Log rank Test*

| Strata Comparison |                  | p-Values   |        |            |
|-------------------|------------------|------------|--------|------------|
| NPAS3_EXPRESSION  | NPAS3_EXPRESSION | Chi-Square | Raw    | Bonferroni |
| <i>absent</i>     | <i>elevated</i>  | 26.8770    | <.0001 | <.0001     |
| <i>absent</i>     | <i>normal</i>    | 20.9520    | <.0001 | <.0001     |
| <i>elevated</i>   | <i>normal</i>    | 0.0189     | 0.8906 | 1.0000     |

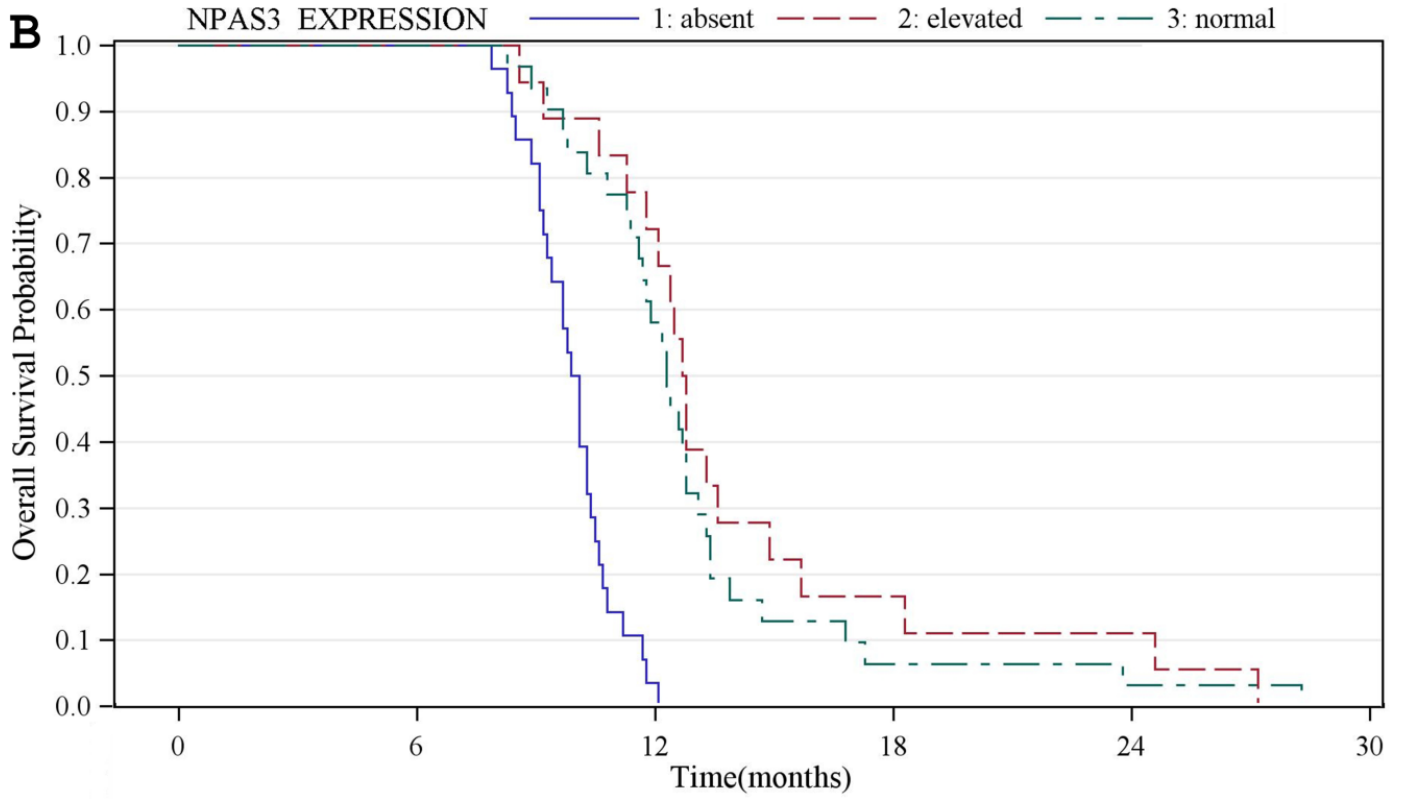

| Expression Pattern | 0  | 6  | 12 | 18 | 24 | 30 |
|--------------------|----|----|----|----|----|----|
| Absent             | 28 | 28 | 1  | 0  | 0  | 0  |
| Elevated           | 18 | 18 | 13 | 3  | 2  | 0  |
| Normal             | 31 | 31 | 18 | 2  | 1  | 0  |

Number of individuals surviving
