# Supplementary material
Source: PubMed Central journal article supplement (PMC3123785)

# Supplemental Figure 1

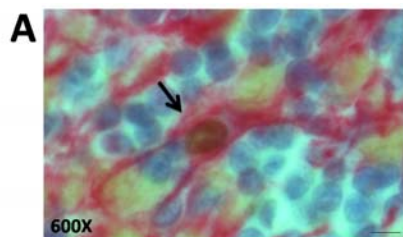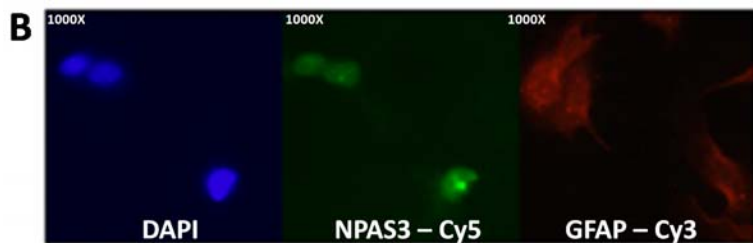

Supplement: mmc1.pdf [file mmc1.pdf]

Supplemental Figure 2

Normal  
Brain

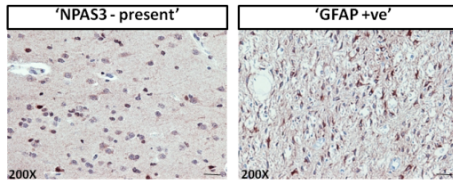

GBM

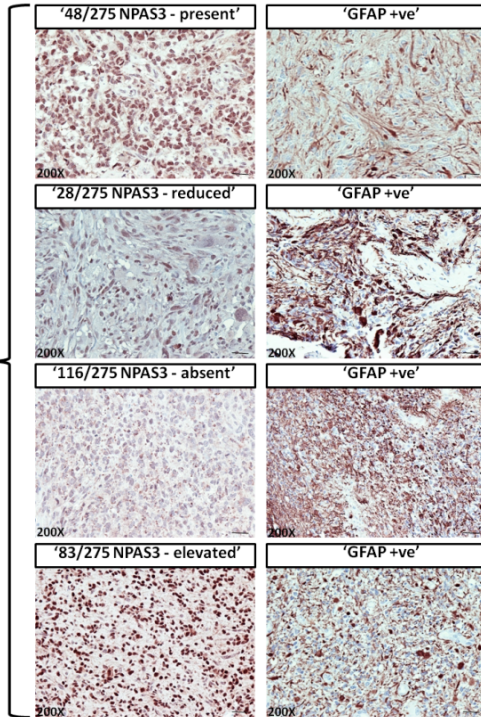

Supplement: mmc2.pdf [file mmc2.pdf]

## Supplemental Figure 4

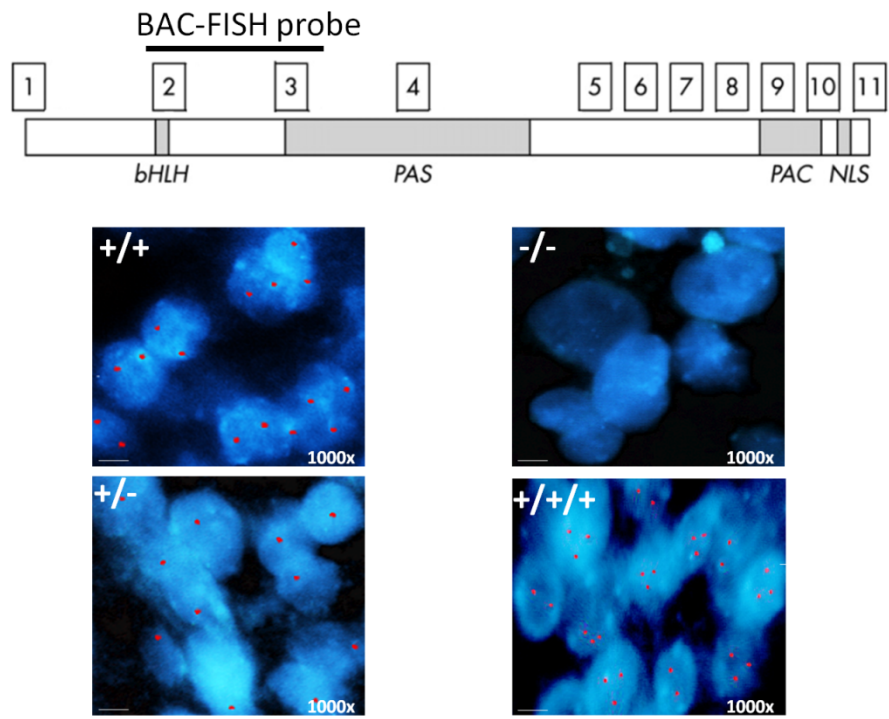

Supplement: mmc4.pdf [file mmc4.pdf]

## Supplemental Figure 5

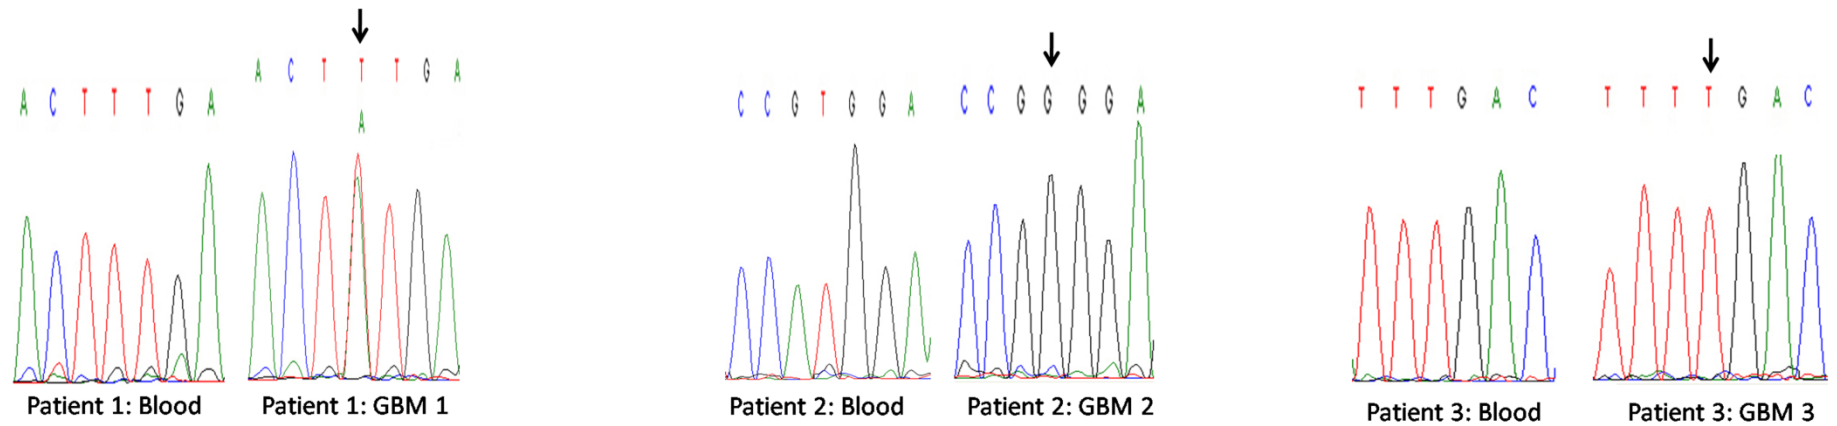

Supplement: mmc5.pdf [file mmc5.pdf]

Supplemental Figure 6

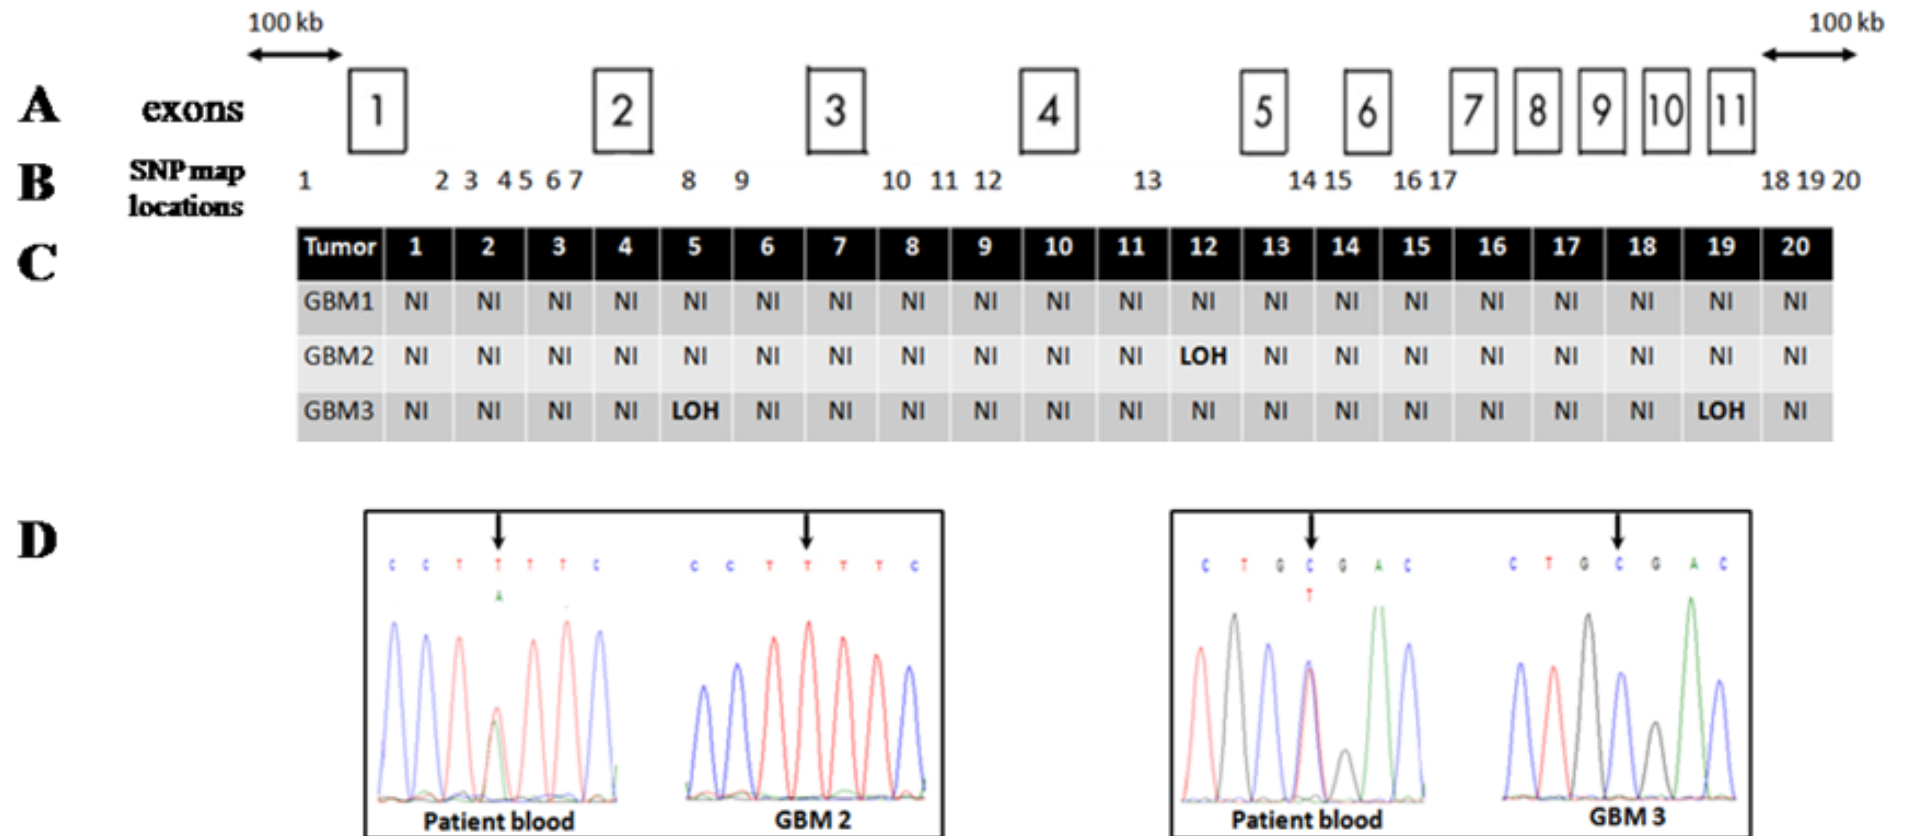

Supplement: mmc6.pdf [file mmc6.pdf]

Supplemental Figure 7

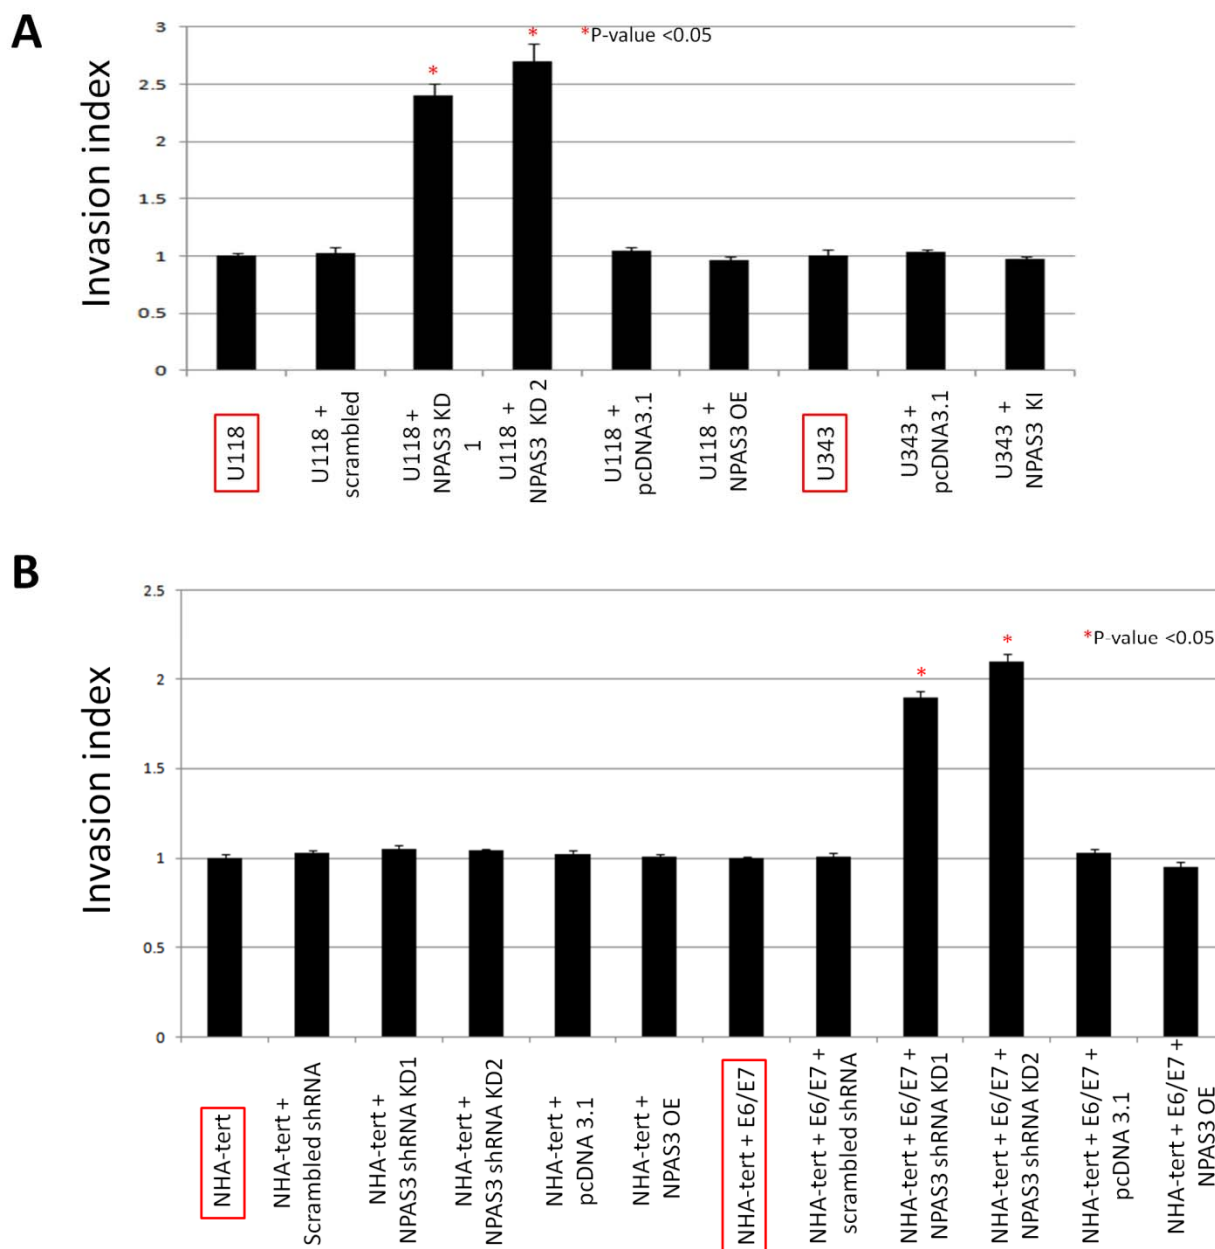

Supplement: mmc7.pdf [file mmc7.pdf]

## Supplemental Figure 8

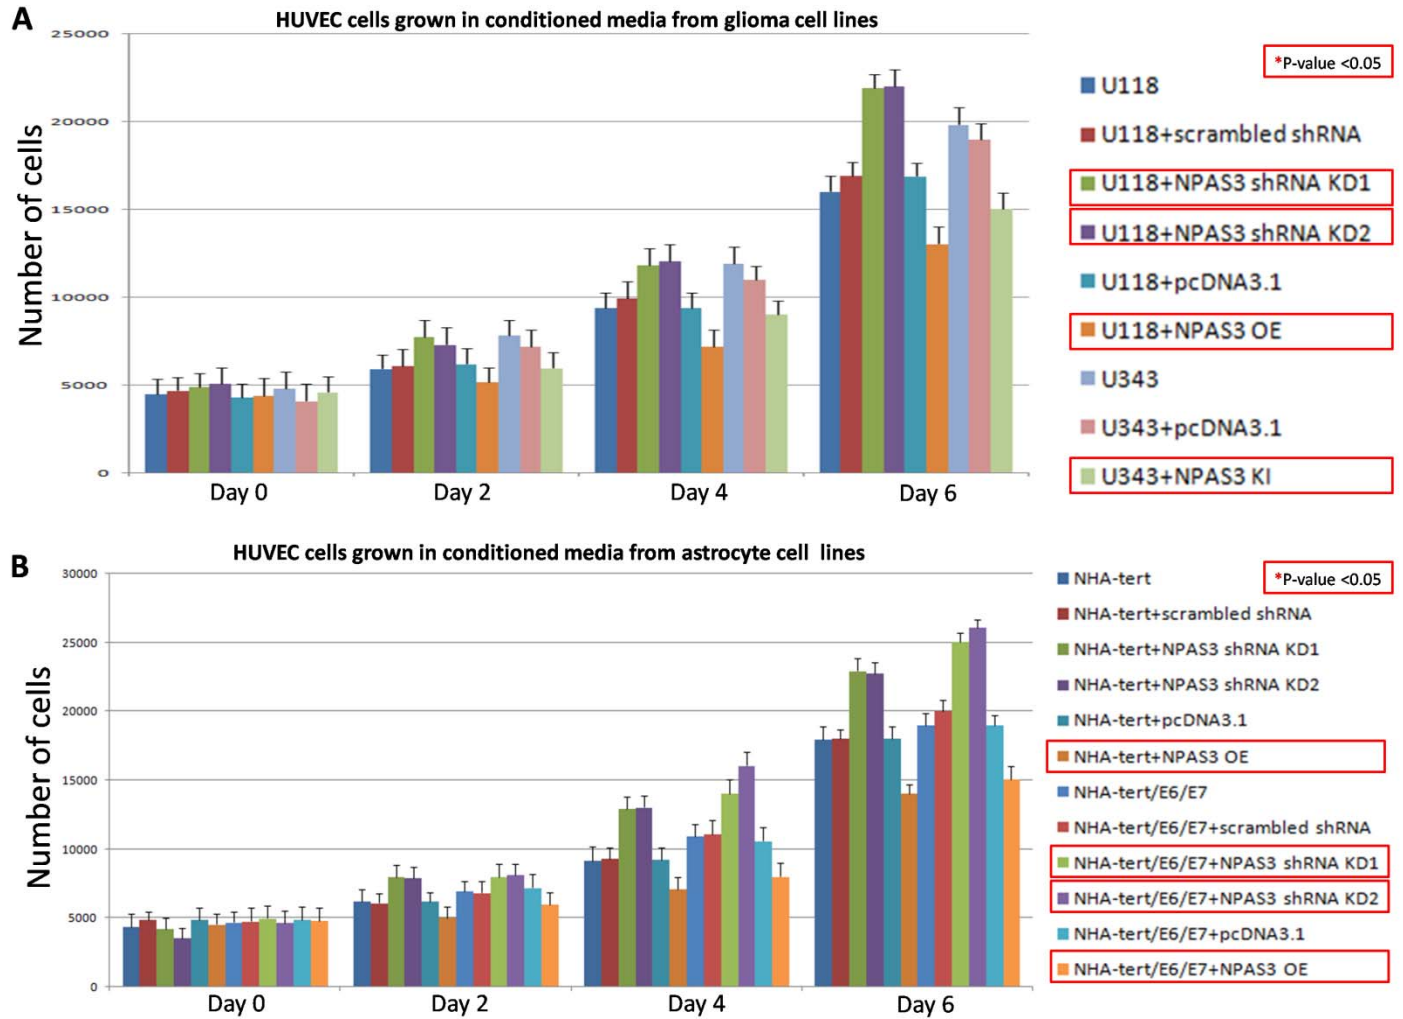

Supplement: mmc8.pdf [file mmc8.pdf]
